# Supplementary figures and images for: The Influenza B Virus Victoria and Yamagata Lineages Display Distinct Cell Tropism and Infection-Induced Host Gene Expression in Human Nasal Epithelial Cell Cultures
Source: MDPI journal article supplement (doi:10.3390/v15091956), 2023-09-20

A)

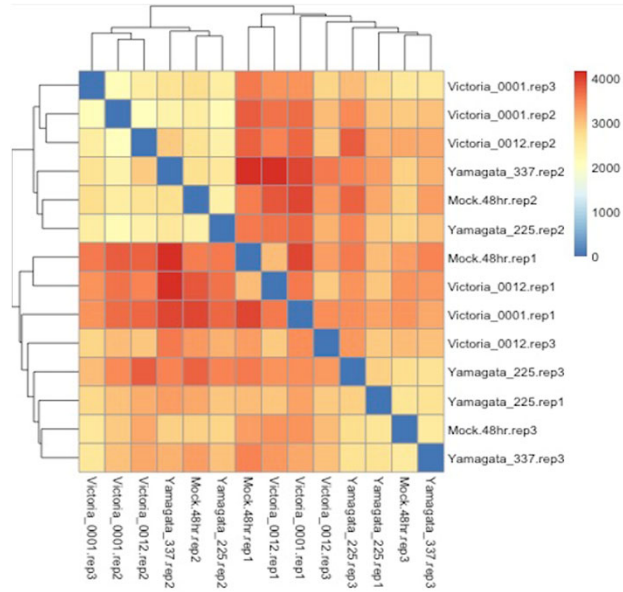

B)

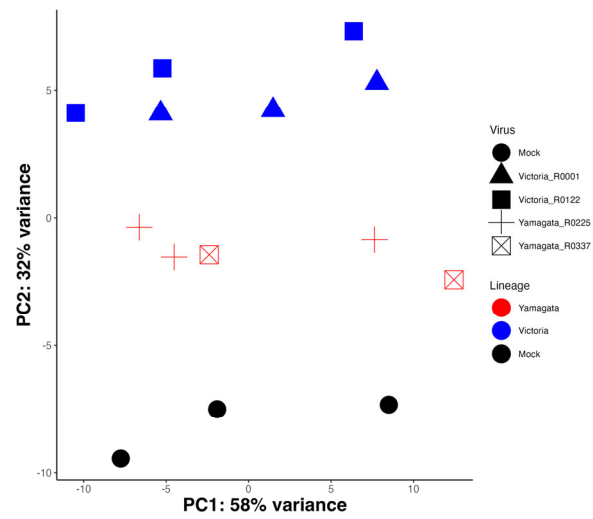

Supplement: s1 [file s1]

A)

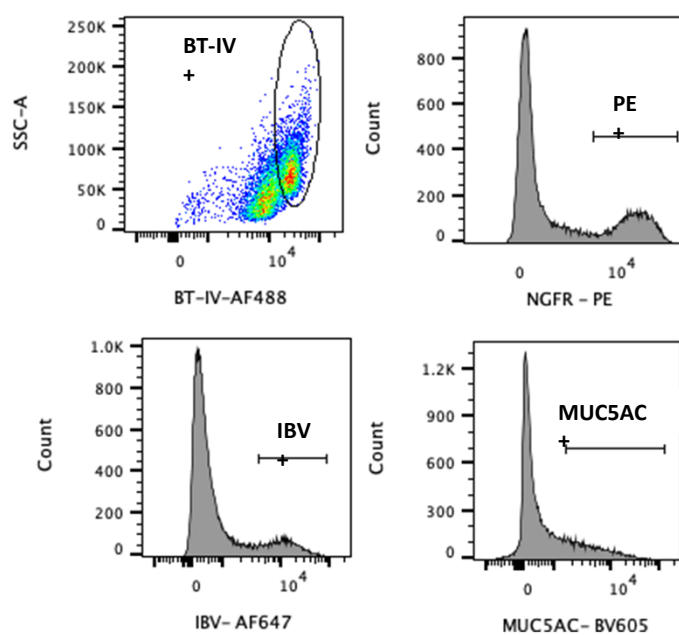

B)

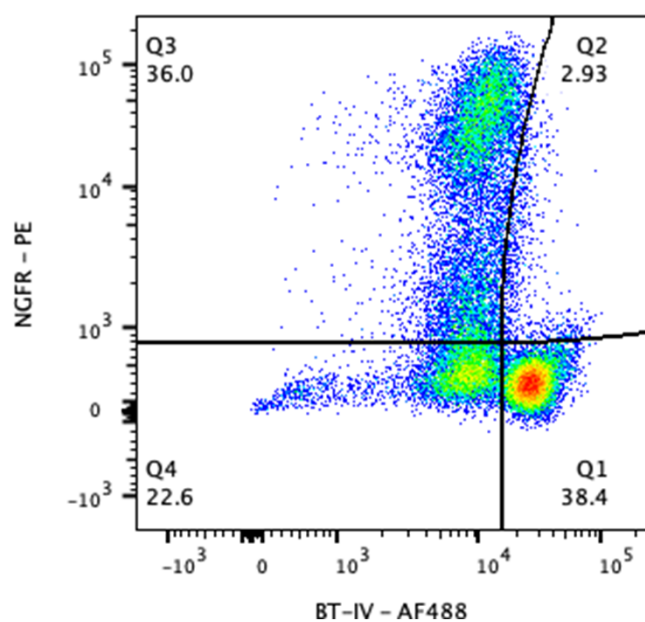

C)

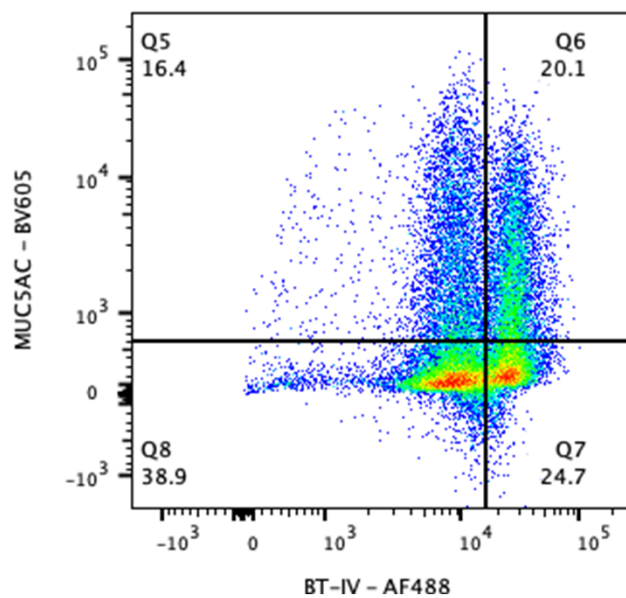

D)

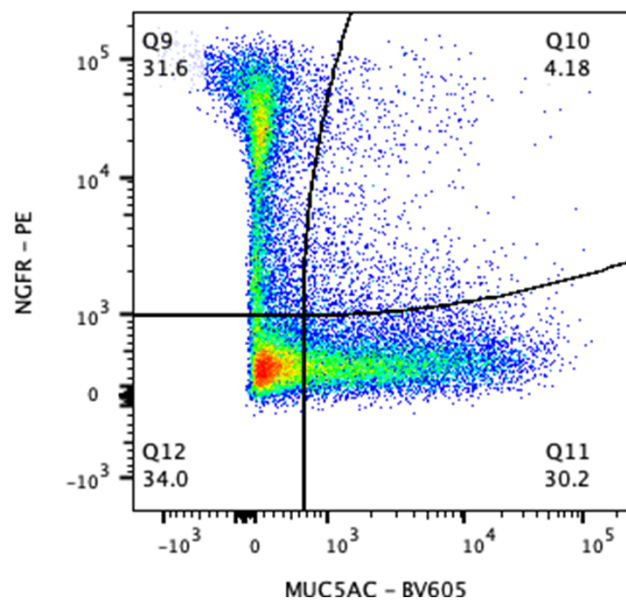

Supplement: s1 [file s1]
